# Supplementary material for: Deciphering cycling voltage-dependent failures of O3-layered cathode for sodium ion battery
Source: Royal Society of Chemistry journal article supplement (doi:10.1039/d3ta07967h), 2024-01-01
Supplement: d3ta07967h1.pdf [file d3ta07967h1.pdf]

## Supporting Information

### **Deciphering cycling voltage dependent failures of O3-layered cathode for sodium ion battery**

Xuejiao Zhao<sup>1</sup>, Lihan Zhang<sup>1</sup>, Xiaoqi Wang<sup>\*,2</sup>, Jinhui Li<sup>1</sup>, Lin Zhang<sup>2</sup>, Di Liu<sup>2</sup>, Rui Yang<sup>2</sup>, Xu Jin<sup>2</sup>, Manling Sui<sup>1</sup>, Pengfei Yan<sup>\*,1</sup>

<sup>1</sup> Beijing Key Laboratory of Microstructure and Property of Solids, Faculty of Materials and Manufacturing, Beijing University of Technology, Beijing 100124, China.

<sup>2</sup> PetroChina Research Institute of Petroleum Exploration & Development, Beijing 100083, China.

#### **\* Corresponding Authors**

Xiaoqi Wang: [wangxq07@petrochina.com.cn](mailto:wangxq07@petrochina.com.cn); Pengfei Yan: [pfyan@bjut.edu.cn](mailto:pfyan@bjut.edu.cn)

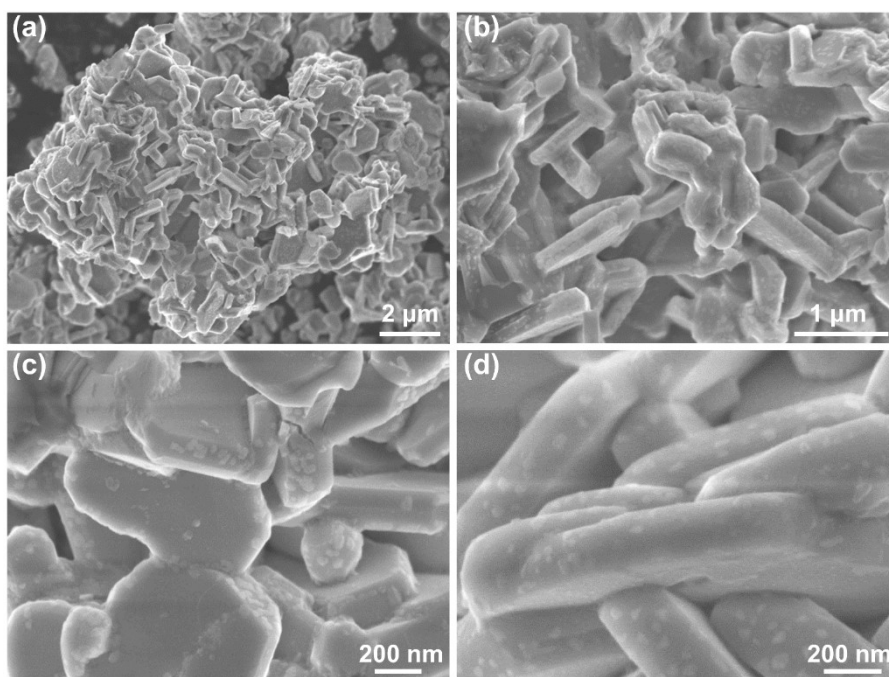

**Figure S1.** SEM images of the NFM sample. **(a, b)** low and **(c, d)** high magnification

SEM images of the NFM.

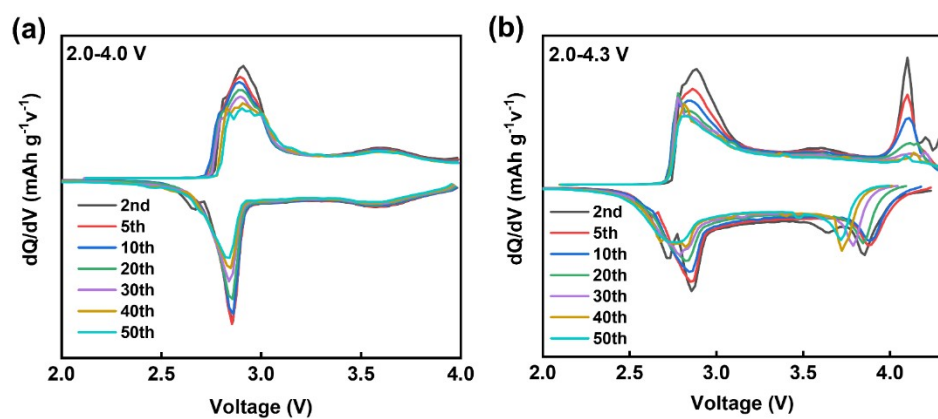

**Figure S2.**  $dQ/dV$  profiles of the NFM cathode upon **(a)** 2.0-4.0 V and **(b)** 2.0-4.3 V cycling.

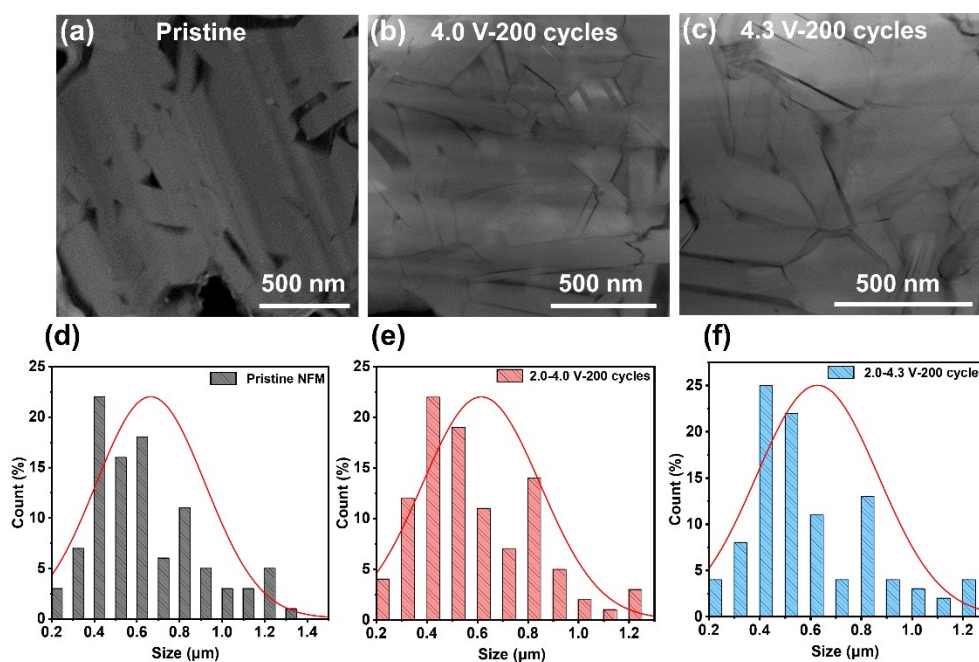

**Figure S3.** (a-c) STEM-HAADF images of NFM sample before and after cycling. (d-e) Normalized grain size distribution of the primary particles before and after cycling. (a, d) Pristine NFM, (b, e) after 200 cycles in the voltage ranges of 2.0-4.0 V, (c, f) after 200 cycles in the voltage ranges of 2.0-4.3 V.

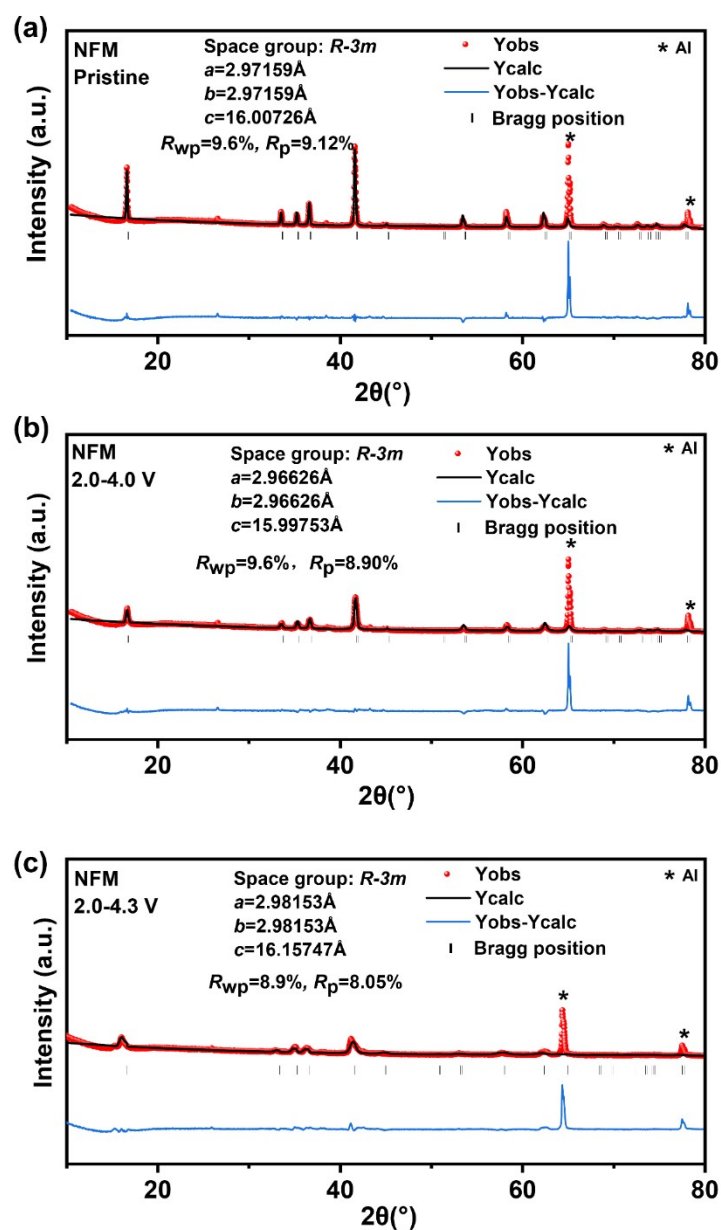

**Figure S4.** XRD Rietveld refinement results of the NFM cathode. **(a)** pristine, **(b)** after 200 cycles in the voltage range of 2.0-4.0 V, **(c)** after 200 cycles in the voltage range of 2.0-4.3 V.

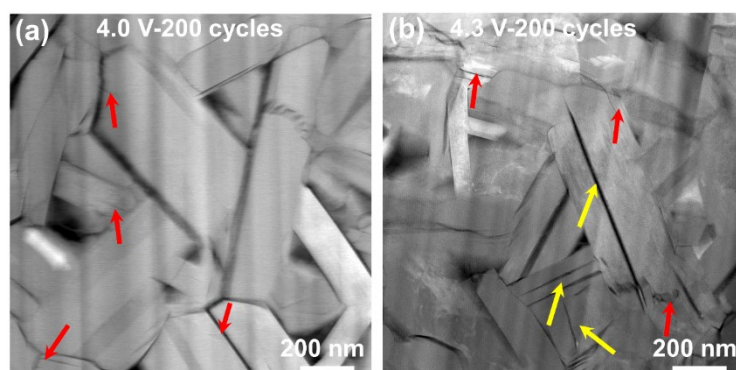

**Figure S5.** STEM-HAADF images of the NFM cathode after 200 cycles at different cutoff voltages. **(a)** 4.0 V, **(b)** 4.3 V. The red arrows indicate surface cracks, and the yellow arrows represent intragranular cracks.

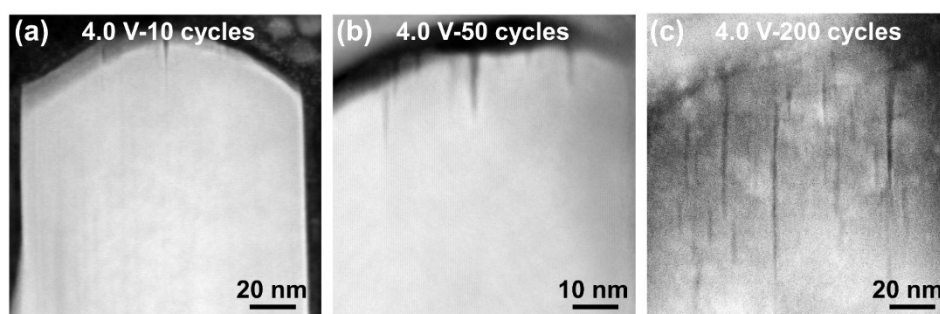

**Figure S6.** STEM-HAADF images showing surface crack evolution with increasing cycling numbers at 2.0-4.0 V. **(a)** 10 cycles, **(b)** 50 cycles, **(c)** 200 cycles.

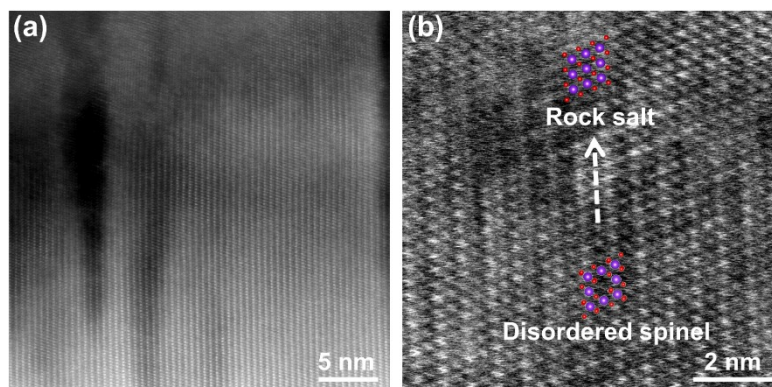

**Figure S7. (a)** High-magnification STEM-HAADF image of surface crack after 200 cycles in the voltage range of 2.0-4.0 V. **(b)** Lattice structure in the surface crack region.

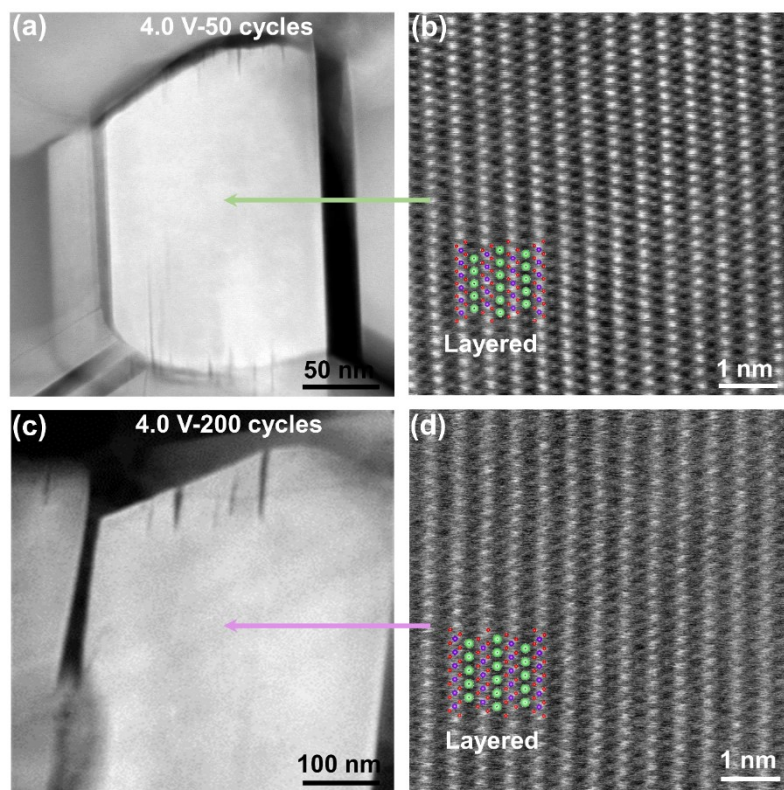

**Figure S8.** STEM-HAADF images of the NFM sample after cycling. **(a)** 50 cycles, **(c)** 200 cycles. **(b, d)** High resolution lattice images from the grain bulk showing the inner bulk lattice remains layered structure after cycling.

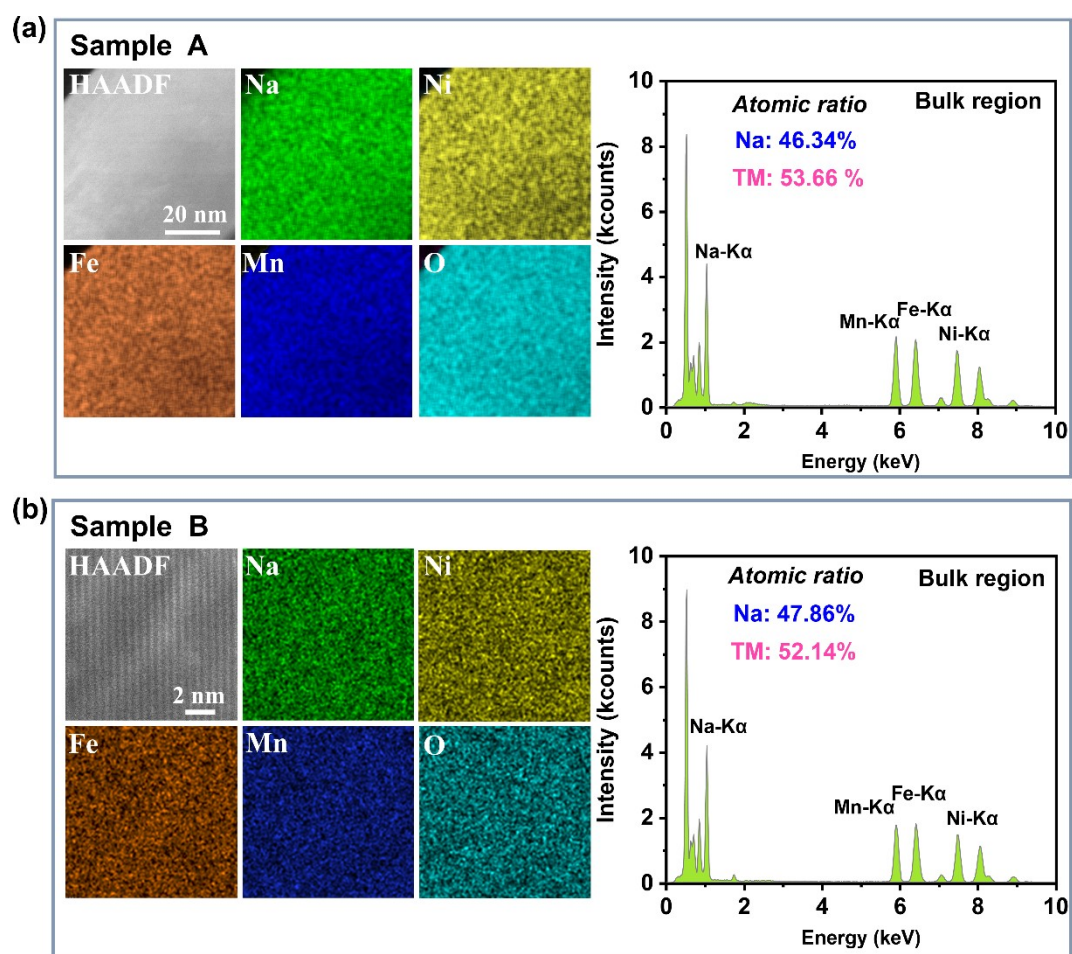

**Figure S9.** STEM-HAADF images, EDS elemental mappings of Na, Ni, Fe, Mn, and corresponding spectra of sample A (a) and sample B (b), showing grain interior with uniform elemental distribution after 200 cycles in the voltage range of 2.0-4.0 V.

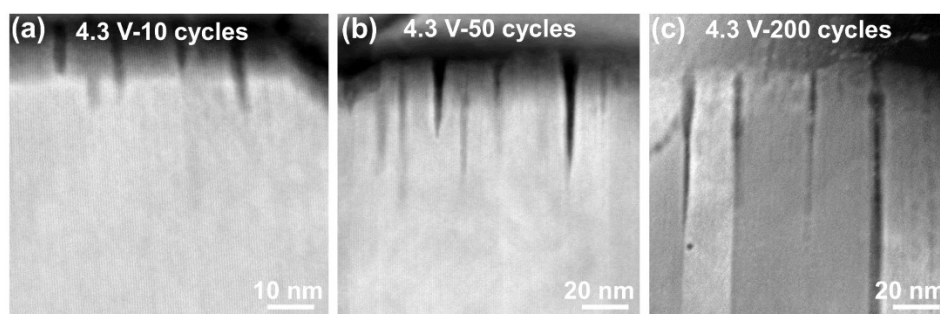

**Figure S10.** STEM-HAADF images showing surface crack evolution with increasing cycling numbers at 2.0-4.3 V. **(a)** 10 cycles, **(b)** 50 cycles, **(c)** 200 cycles.

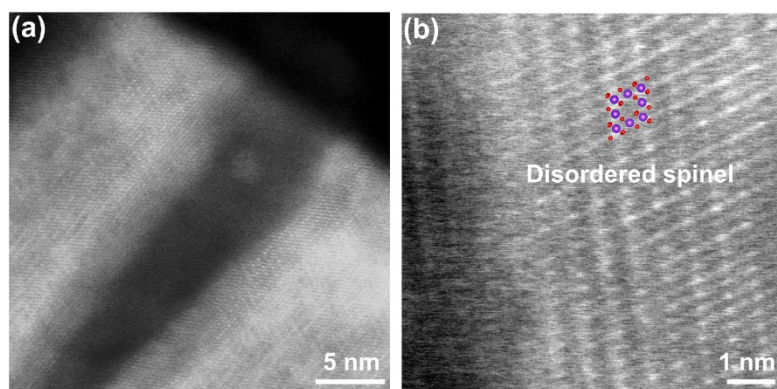

**Figure S11.** (a) High-magnification STEM-HAADF image of surface crack after 200 cycles in the voltage range of 2.0-4.3 V. (b) Lattice structure from the crack surface region.

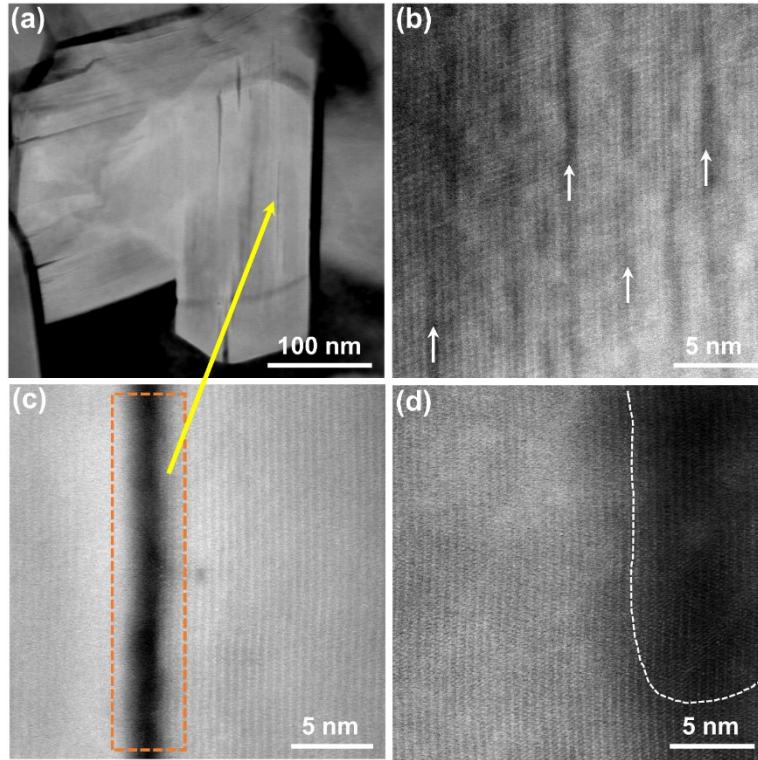

**Figure S12.** (a) Low-magnification STEM-HAADF image of the sample after 200 cycles in the voltage range of 2.0-4.3 V. (b-d) High resolution lattice images from the grain bulk showing the planar defects and the nano-void. ((b-c) intragranular cracks, (d) nano-void).

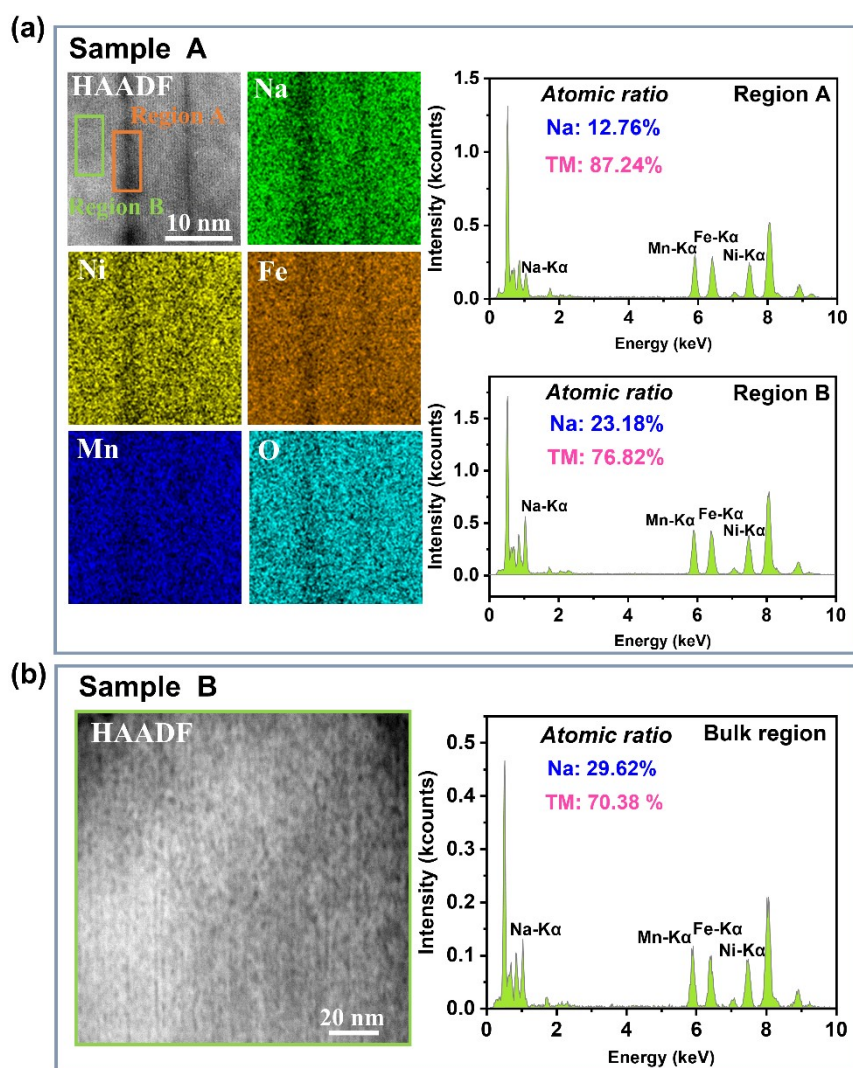

**Figure S13.** STEM-HAADF images, EDS elemental mappings of Na, Ni, Fe, Mn and corresponding spectra from the grain interior of sample A **(a)** and sample B **(b)**, after 200 cycles in the voltage range of 2.0-4.3 V.

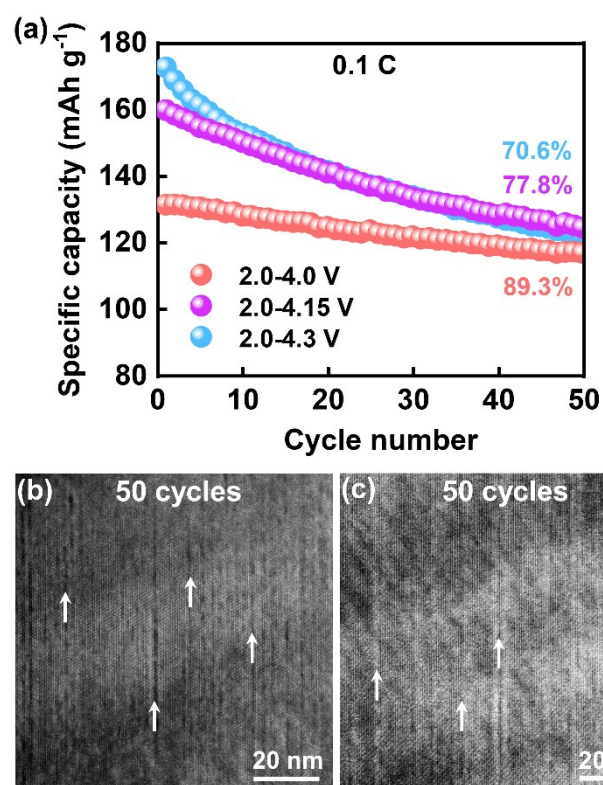

**Figure S14.** (a) The capacity retentions after 50 cycles in the voltage ranges of 2.0-4.0 V, 2.0-4.15 V and 2.0-4.3 V. (b-c) STEM-HAADF images of the NFM sample after 50 cycles in the voltage range of 2.0-4.3 V.

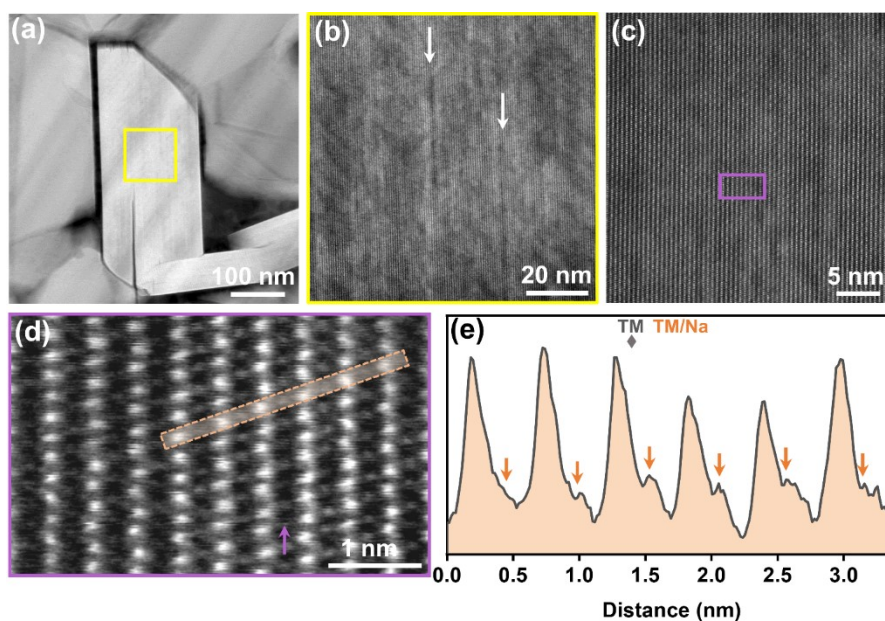

**Figure S15.** (a) Low-magnification STEM-HAADF image of the sample after 10 cycles at 2.0-4.3 V. (b) High resolution lattice image from the grain bulk. White arrows indicate the bulk defects. (c) High resolution lattice image from grain bulk. (d-e) Atomic-resolution STEM-HAADF image and its corresponding line profile, showing cation interlayer mixing feature.

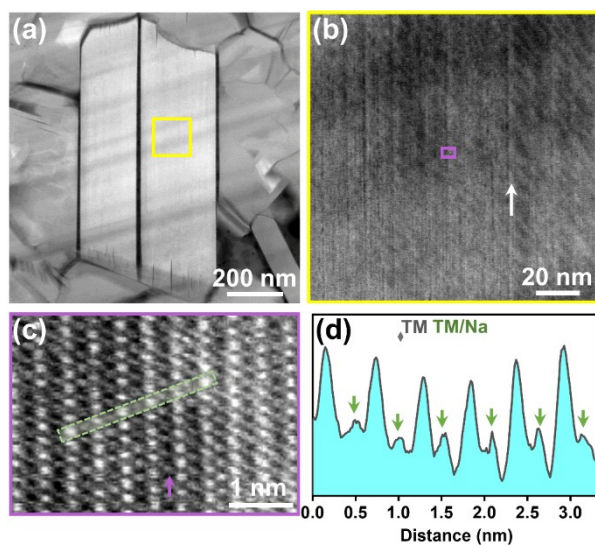

**Figure S16.** (a) Low-magnification STEM-HAADF image of the sample after 50 cycles at 2.0-4.3 V. (b) High resolution lattice image from grain bulk. (c-d) Atomic-resolution STEM-HAADF image and its corresponding line profile, showing cation interlayer mixing feature.

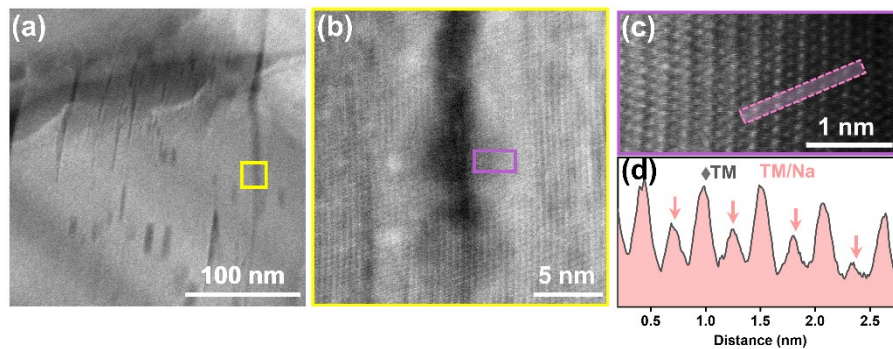

**Figure S17.** (a) Low-magnification STEM-HAADF image of the sample after 200 cycles at 2.0-4.3 V. (b) High resolution lattice image from the grain bulk. (c-d) Atomic-resolution STEM-HAADF images and their corresponding line profile, showing heavy interlayer mixing feature.

**Table S1.** Summary of electrochemical performance of O3-NFM in the literatures.

| Cycle voltage | Initial capacity                  | Cycle number | Capacity retention | Reference      |
|---------------|-----------------------------------|--------------|--------------------|----------------|
| 2.0-4.0 V     | 136 mAh g <sup>-1</sup> (0.1 C)   | 100          | 80.5% (1 C)        | 1 <sup>1</sup> |
|               | 123 mAh g <sup>-1</sup> (1 C)     |              |                    |                |
| 2.0-4.0 V     | 128.0 mAh g <sup>-1</sup> (0.1 C) | 100          | 83% (1 C)          | 2 <sup>2</sup> |
| 2.0-4.0 V     | 130.2 mAh g <sup>-1</sup> (0.1 C) | 200          | 67% (1 C)          | 3 <sup>3</sup> |
|               | 122.0 mAh g <sup>-1</sup> (1 C)   |              |                    |                |
| 2.0-4.0 V     | 133.2 mAh g <sup>-1</sup> (0.1 C) | 200          | 35.4% (1C)         | 4 <sup>4</sup> |
| 2.0-4.0 V     | 132.0 mAh g <sup>-1</sup> (0.1 C) | 15           | 92.4% (0.1 C)      | 5 <sup>5</sup> |
| 2.0-4.0 V     | 125.4 mAh g <sup>-1</sup> (0.1 C) | 200          | 66.7% (1 C)        | 6 <sup>6</sup> |
|               | 107.5 mAh g <sup>-1</sup> (1 C)   |              |                    |                |
| 2.0-4.0 V     | 139.4 mAh g <sup>-1</sup> (0.1 C) | 200          | 53.1% (1C)         | 7 <sup>7</sup> |
|               | 128.0 mAh g <sup>-1</sup> (1 C)   |              |                    |                |
| 2.0-4.1 V     | 135.1 mAh g <sup>-1</sup> (0.1 C) | 150          | 46.9% (1C)         | 8 <sup>8</sup> |
| 2.0-4.3V      | 157.6 mAh g <sup>-1</sup> (0.1 C) | 15           | 64.4% (0.1 C)      | 5 <sup>5</sup> |
| 1.5-4.2 V     | 159.6 mAh g <sup>-1</sup> (0.1 C) | 100          | 58% (1 C)          | 9 <sup>9</sup> |
| 2.0-4.0 V     | 131.2 mAh g <sup>-1</sup> (0.1 C) | 200          | 68.8% (0.1 C)      | this work      |
|               | 127.4 mAh g <sup>-1</sup> (0.1 C) | 200          | 75.6% (1 C)        |                |
| 2.0-4.3 V     | 171.5 mAh g <sup>-1</sup> (0.1 C) | 200          | 49.1% (0.1 C)      | this work      |

**Table S2.** Crystallographic parameters of the NFM samples before and after 200 cycles refined by Rietveld method.

| NFM       | a (Å)   | c (Å)    | V (Å <sup>3</sup> ) |
|-----------|---------|----------|---------------------|
| Pristine  | 2.97159 | 16.00726 | 122.413             |
| 2.0-4.0 V | 2.96626 | 15.99753 | 121.899             |
| 2.0-4.3 V | 2.98153 | 16.15747 | 124.389             |

## References:

1. H. Wang, X.-Z. Liao, Y. Yang, X. Yan, Y.-S. He and Z.-F. Ma, *J. Electrochem. Soc.*, 2016, **163**, A565-A570.
2. Y. Sun, H. Wang, D. Meng, X. Li, X. Liao, H. Che, G. Cui, F. Yu, W. Yang, L. Li and Z.-F. Ma, *ACS Appl. Energy Mater.*, 2021, **4**, 2061-2067.
3. L. Sun, Y. Xie, X. Z. Liao, H. Wang, G. Tan, Z. Chen, Y. Ren, J. Gim, W. Tang, Y. S. He, K. Amine and Z. F. Ma, *Small*, 2018, **14**, 1704523.
4. W. Wang, Y. Sun, P. Wen, Y. Zhou and D. Zhang, *J. Energy. Storage*, 2024, **79**, 110117.
5. M. Jeong, H. Lee, J. Yoon and W.-S. Yoon, *J. Power Sources*, 2019, **439**, 227064.
6. Q. Tao, H. Ding, H. Zhao, J. Huang, B. Dai and J. Li, *J. Alloys Compd.*, 2024, **976**, 172977.
7. W. Li, Q. Chen, D. Zhang, C. Fang, S. Nian, W. Wang, C. Xu and C. Chang, *Mater. Today Commun.*, 2022, **32**, 103839.
8. T. Song, L. Chen, D. Gastol, B. Dong, J. F. Marco, F. Berry, P. Slater, D. Reed and E. Kendrick, *Chem. Mater.*, 2022, **34**, 4153-4165.
9. S. Zhao, Q. Shi, R. Qi, X. Zou, J. Wang, W. Feng, Y. Liu, X. Lu, J. Zhang, X. Yang and Y. Zhao, *Electrochim. Acta*, 2023, **441**, 141859.
